1 **Human hypertrophic cardiomyopathy mutation R712L suppresses the working**  
2 **stroke of cardiac myosin and can be rescued by omecamtiv mecarbil**

3

4 Authors: Aaron Snoberger<sup>1</sup>, Bipasha Barua<sup>2</sup>, Jennifer L. Atherton<sup>3</sup>, Henry Shuman<sup>1</sup>,  
5 Eva Forgacs<sup>3</sup>, Yale E. Goldman<sup>1</sup>, Donald A. Winkelmann<sup>2</sup>, E. Michael Ostap<sup>1</sup>

6

7 Affiliations:

8 <sup>1</sup> Pennsylvania Muscle Institute, Perelman School of Medicine, University of  
9 Pennsylvania, Philadelphia, PA 19104, USA

10 <sup>2</sup> Department of Pathology and Laboratory Medicine, Robert Wood Johnson Medical  
11 School, Rutgers University, Piscataway, NJ 08854, USA

12 <sup>3</sup> Department of Physiological Sciences, Eastern Virginia Medical School, Norfolk,  
13 Virginia 23507, USA

14

15 **Y. E. Goldman, D.A. Winkelmann, and E. Michael Ostap are co-corresponding**  
16 **authors.**

17 ORCID numbers.

18 Yale E. Goldman: 0000-0002-2492-9194

19 Donald A. Winkelmann: 0000-0003-1932-2379

20 E. Michael Ostap: 0000-0003-0544-9360

21 Aaron Snoberger: 0000-0001-9607-9312

22 **Abstract (150/150)**

23 Hypertrophic cardiomyopathies (HCMs) are the leading cause of acute cardiac failure in  
24 young individuals. Over 300 mutations throughout  $\beta$ -cardiac myosin, including in the  
25 motor domain, are associated with HCM. A  $\beta$ -cardiac myosin motor mutation (R712L)  
26 leads to a severe form of HCM. Actin-gliding motility of R712L-myosin is inhibited,  
27 despite near normal ATPase kinetics. By optical trapping, the working stroke of R712L-  
28 myosin was decreased 4-fold, but actin-attachment durations were normal. A prevalent  
29 hypothesis that HCM mutants are hypercontractile is thus not universal. R712 is  
30 adjacent to the binding site of the heart failure drug omecamtiv mecarbil (OM). OM  
31 suppresses the working stroke of normal  $\beta$ -cardiac myosin, but remarkably, OM rescues  
32 the R712L-myosin working stroke. Using a flow chamber to interrogate a single  
33 molecule during buffer exchange, we found OM rescue to be reversible. Thus, the  
34 R712L mutation uncouples lever arm rotation from ATPase activity and this inhibition is  
35 rescued by OM.

## 36 INTRODUCTION

37 Hypertrophic cardiomyopathies affect 1 in 500 individuals and are the leading  
38 cause of sudden cardiac failure in individuals under 35 years of age [1]. The disease is  
39 characterized by left ventricular hypertrophy, cardiomyocyte disarray, and interstitial  
40 fibrosis resulting in impaired diastolic function often with preserved or enhanced systolic  
41 function. Severity of HCM varies markedly, with severe cases resulting in cardiac  
42 arrhythmias and potential for sudden cardiac death. In congenital HCM, mutations  
43 occur in more than 20 sarcomeric protein genes including MYH7 ( $\beta$ -cardiac myosin  
44 heavy chain), the predominant myosin isoform responsible for active contraction in  
45 human ventricles [1, 2].

46 Over 300 mutations throughout the entire coding region of MYH7 have been  
47 associated with HCM [3], with many of these occurring in regions predicted to affect  
48 mechanochemical activity. Some mutations are clustered in a region of the myosin  
49 motor that interacts with the thick filament, termed the “mesa,” that stabilizes a  
50 biochemically “off” state [4]. A widely cited model relating myosin function to disease  
51 proposes that HCM arises from myosin mutations that enhance activity yielding  
52 hypercontractile myocytes (for review, see [5]). Many MYH7 mutations examined in  
53 biophysical and physiological studies have been found to cause changes in individual  
54 kinetic steps that impact the fraction of intermediates in force producing states. While  
55 some confer apparent hypercontractile activity, no uniform kinetic signature for HCM  
56 has emerged from these studies (e.g., [6-8]). Thus, it is not clear that all HCM  
57 mutations in the myosin motor conform to the hypercontractile hypothesis. It is  
58 therefore important to perform experiments that assess the biochemical and mechanical

59 activities of a range of HCM mutations to understand how missense mutations affect  
60 contractile activity.

61 R712L is a rare missense mutation in the motor domain of  $\beta$ -cardiac myosin that  
62 causes HCM and is characterized by sudden cardiac death [9]. R712 forms a salt  
63 bridge with E497 that is in position to stabilize the mechanical interaction between the  
64 converter/lever-arm domain and the relay helix in the motor, which couples the ATP  
65 binding site to the converter (**Figure 1A**). Disruption of this salt bridge in drosophila  
66 indirect flight muscle myosin resulted in impaired myosin ATPase and motility rates, and  
67 disorganized sarcomere assembly [10]. Since the converter domain amplifies small  
68 conformational changes in the ATPase site into large lever arm swings, its disruption  
69 could decouple ATPase activity from the lever arm swing.

70 R712 is located directly adjacent to the binding site for the heart failure  
71 therapeutic drug omecamtiv mecarbil (OM) [11, 12]. We previously found that addition  
72 of OM to recombinantly expressed human  $\beta$ -cardiac myosin drastically reduced its  
73 working stroke for translocating actin and prolonged its actin attachment duration [13].  
74 Although OM abrogates the working stroke of myosin, the prolonged attachment  
75 increases calcium sensitivity in muscle fibers via cooperative activation of the thin  
76 filament regulatory system, which activates the muscle [14]. At submicromolar  
77 concentrations, it has been shown to improve cardiac output in both animal models and  
78 in human clinical trials [15-18]. We reasoned that the HCM mutation of R712 to a  
79 Leucine (R712L), located adjacent to the drug binding site, might serve as a  
80 mechanistically informative target, and might alter the kinetics and step size of  $\beta$ -cardiac  
81 myosin in a similar manner to OM.

82           In the present work, we show that the R712L mutation in recombinant human  $\beta$ -  
83 cardiac myosin does not directly confer gain-of-function, but, rather results in inhibited  
84 motility due to a 4-fold decrease in working stroke amplitude, while only marginally  
85 affecting actin-attachment kinetics. All-atom molecular dynamics simulations of the  
86 R712L structure suggest disruption of the R712-E497 salt bridge increases the  
87 compliance of the lever arm by reducing mechanical stability of the interaction between  
88 the converter and the relay helix in the motor domain. Thus, we propose that the  
89 reduced working stroke results from uncoupling the converter/lever-arm motions from  
90 the ATPase-dependent changes in the motor domain. Surprisingly, addition of OM did  
91 not further suppress motility and the working stroke, but instead rescued activity in a  
92 concentration-dependent fashion. We designed a flow chamber that enabled exchange  
93 of buffers in real-time while maintaining cross-bridge cycles with individual actomyosin  
94 pairs in 3-bead optical trap assays. These solution changes allowed us to show  
95 reversible rescue of single mutant myosin molecules by OM.

## 96 RESULTS

### 97 The $\beta$ -cardiac myosin HCM mutant, R712L, has impaired actin filament motility

98 Human  $\beta$ -cardiac myosin wildtype (WT-myosin) and R712L mutant (R712L-  
99 myosin) HMM constructs were expressed in C2C12 myoblasts and purified (**Figure 1—**  
100 **supplement 1**). We first used *in vitro* gliding assays to measure the ability of WT- and  
101 R712L-myosins to move actin filaments. Myosins were adsorbed to a nitrocellulose-  
102 coated glass coverslip, and the proportion of filaments that moved and their speeds  
103 were determined as a function of the myosin concentration. R712L-myosin propelled  
104 actin filaments more slowly than WT-myosin at all concentrations tested, with maximum  
105 velocities of  $1.46 \pm 0.11 \mu\text{m}\cdot\text{s}^{-1}$  for WT-myosin and  $0.29 \pm 0.02 \mu\text{m}\cdot\text{s}^{-1}$  (mean  $\pm$  SD) for  
106 R712L-myosin at loading concentrations  $100 \mu\text{g}\cdot\text{mL}^{-1}$  (**Figure 1B, C, Table 1, and**  
107 **Movie 1**). Although a substantial fraction of actin filaments was immobile at any given  
108 time in the presence of R712L-myosin, nearly all filaments were motile at some point  
109 during the assay with both constructs (**Figure 1B and Movie 1**). Thus, the mutant  
110 motors are able to power actin gliding, but at a substantially inhibited rate.

111 As discussed above, the side chain of R712 forms a highly conserved salt bridge  
112 with E497 near the fulcrum of the motor's lever arm. A conserved acidic mutation  
113 (E497D) at this site also causes HCM in humans, but we found that an E497D-HMM  
114 construct powers actin gliding at nearly wildtype rates ( $1.41 \pm 0.19 \mu\text{m}\cdot\text{s}^{-1}$ ). Thus, we  
115 focused our efforts on characterizing R712L.

116

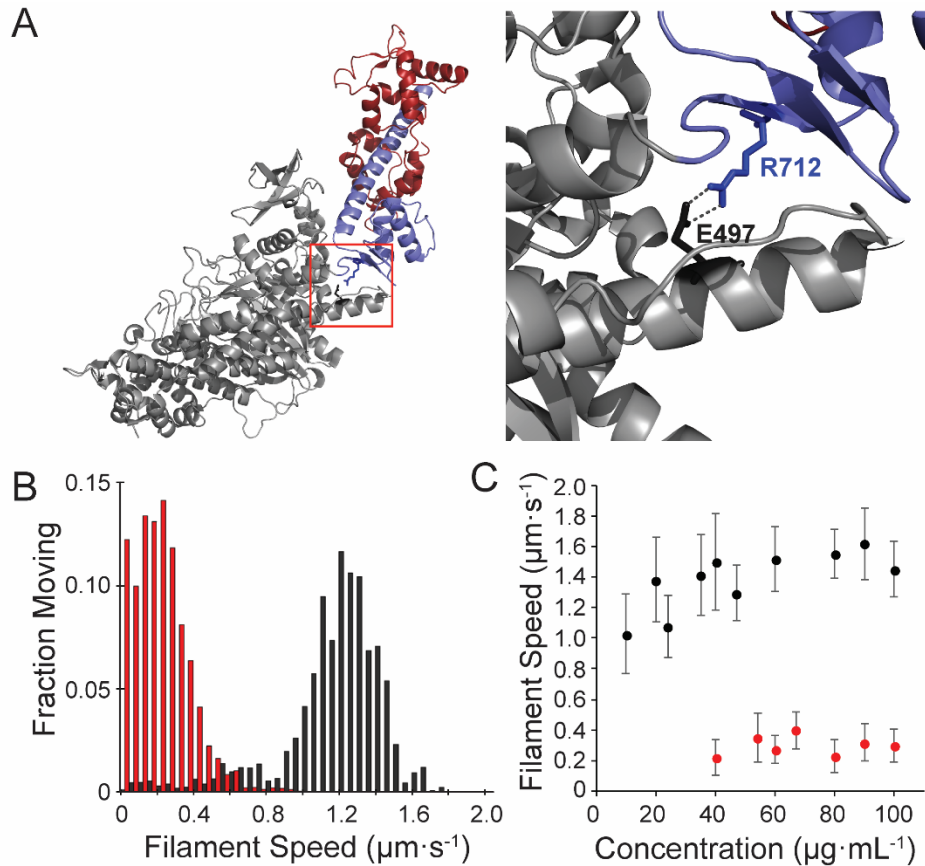

**Figure 1: Motility of the HCM Mutant, R712L-myosin, is impaired. (A)** Cartoon rendering of the  $\beta$ -cardiac myosin crystal structure (PDB: 5N69). The motor domain (grey, 1-707), converter/lever arm domain (blue, 708-806), and the essential light chain (red) are shown. The box indicates the region expanded to the right showing the E497-R712 salt bridge located at the fulcrum of the lever arm. **(B)** Distribution of individual filament gliding speeds from motility assays. WT-myosin (black) has a higher average motility rate compared to R712L-myosin (red). **(C)** Increasing loading concentrations of myosin were added and the average filament speed of fluorescently labelled actin filaments was assessed. Higher concentrations of R712L-myosin were required to achieve motility.

117  **$\beta$ -cardiac myosin R712L has normal ATPase activity and attachment durations**

118 We studied the biochemical kinetics of WT- and R712L-myosin to determine how  
119 the mutation affects actin-activated ATPase activity (**Table 1—supplement 1-5**). The  
120 R712L mutation has only minor effects on the individual rate constants of the ATPase  
121 cycle. There is a 2-fold increase in the actin-activated  $P_i$  release rate (**Table 1—**  
122 **supplement 1**), which is presumably the rate-limiting step of the ATPase cycle.  
123 Notably, there was a ~2-fold increase in the rate of ADP release from actin-bound  
124 R712L myosin ( $142\text{ s}^{-1}$ ) compared to WT-myosin ( $73\text{ s}^{-1}$ ) (**Table 1—supplement 2**).  
125 This result is surprising, since normally the rate of ADP dissociation limits unloaded  
126 shortening velocity of the intact muscle, and thus a  $> 2$ -fold increase in ADP release  
127 would be expected to produce higher velocity in the gliding assay; yet, R712L-myosin  
128 has a 5-fold slower actin gliding rate (**Figure 1B, C, and Table 1**). These considerations  
129 suggest that ADP release may not limit actin gliding velocity for R712L-myosin, or there  
130 is a structural modification in the mutant motor that changes the linkage between the  
131 ATPase and mechanical activities.

132

133 **R712L-myosin HMM has a defective, single-step working stroke**

134 The conserved salt bridge involving E497-R712, which is disrupted in the mutant,  
135 is located at a mechanically crucial region that links myosin's relay-helix with the  
136 converter/lever arm (**Figure 1A**) [10-12, 19]. We performed all-atom molecular  
137 dynamics simulations to ascertain the effect of the R712L mutation on the equilibrium  
138 structure of the MgADP state of  $\beta$ -cardiac myosin (PDB 6FSA). The position of the  
139 myosin lever-arm and converter fluctuate during a 100 ns simulation, but remain close



**Table 1: Transient and steady-state kinetic characterization of  $\beta$ -cardiac HMM variants with and without OM**

| Kinetic Step                                     | *Method                   | Rate/<br>equilib<br>constant    | WT-Myosin         | WT-Myosin<br>+ OM | R712L-<br>Myosin  | R712L-<br>Myosin +<br>OM |
|--------------------------------------------------|---------------------------|---------------------------------|-------------------|-------------------|-------------------|--------------------------|
| ADP dissociation                                 | SF-LC                     | $k_{-AD}$ ( $s^{-1}$ )          | $73 \pm 2.3$      | $82 \pm 3.5$      | $142 \pm 11$      | $157 \pm 6.0$            |
|                                                  |                           | $K_{AD}$ ( $\mu M$ )            | $19 \pm 1.2$      | $22 \pm 1.1$      | $34 \pm 1.8$      | $36 \pm 1.8$             |
| Dissociation of AM<br>by ATP                     | SF-LC                     | $k_{-TA}$ ( $s^{-1}$ )          | $1191 \pm 109$    | $1129 \pm 80$     | $1201 \pm 42$     | $1168 \pm 43$            |
| ATP binding to AM                                | SF-LC                     | $k_{AT}$ ( $\mu M^{-1}s^{-1}$ ) | $4.2 \pm 1.2$     | $5.9 \pm 1.5$     | $4.5 \pm 0.5$     | $4.4 \pm 0.5$            |
| ATP hydrolysis                                   | SF-Fluor                  | $k_H + k_{-H}$ ( $s^{-1}$ )     | $167 \pm 3.2$     | $138 \pm 3.0$     | $87 \pm 2.0$      | $88 \pm 2.0$             |
| ATP Binding                                      | SF-Fluor                  | $k_T$ ( $\mu M^{-1}s^{-1}$ )    | $5.6 \pm 0.6$     | $5.5 \pm 0.6$     | $7.1 \pm 1.0$     | $6.9 \pm 0.9$            |
| Pi release (TF)                                  | MDCC-<br>PBP              | $k_{-DAP}$ ( $s^{-1}$ )         | $7.3 \pm 0.8$     | $31 \pm 1.1$      | $17 \pm 0.6$      | $17 \pm 0.4$             |
|                                                  |                           | $K_{TF}$ ( $\mu M$ )            | < 1               | $3.7 \pm 0.59$    | < 1               | $2.1 \pm 0.78$           |
| Pi release                                       | MDCC-<br>PBP              | $k_{-DP}$ ( $s^{-1}$ )          | $0.014 \pm 0.002$ | $0.009 \pm 0.001$ | $0.019 \pm 0.004$ | $0.014 \pm 0.002$        |
| TF activated<br>steady-state<br>ATPase $pCa = 4$ | NADH-<br>coupled<br>assay | $V_{max}$ ( $s^{-1}$ )          | $5.1 \pm 0.1$     | $2.1 \pm 0.1$     | $5.7 \pm 0.1$     | $5.5 \pm 0.1$            |
|                                                  |                           | $K_{ATPase}$ ( $\mu M$ )        | $1.9 \pm 0.2$     | $0.35 \pm 0.11$   | $0.48 \pm 0.06$   | $0.43 \pm 0.06$          |
| Unloaded<br>shortening velocity                  | Motility                  | $\mu m \cdot s^{-1}$            | $1.46 \pm 0.11$   | $0.05 \pm 0.01$   | $0.29 \pm 0.02$   | $1.1 \pm 0.26$           |

\*Key kinetic rate and equilibrium constants were determined by various methods: SF-LC, stopped flow light scattering; SF-Fluor, stopped flow tryptophan fluorescence; MDCC-PBP, MDCC-phosphate binding protein; Motility, In vitro motility assay. TF: native porcine thin filaments.

140 to the orientation found in the crystal structure (**Figure 2A**). The interface between the  
141 C-terminal end of the relay helix remains stably coupled to the  $\beta$ -sheet at the base of  
142 the converter domain. This coupling is mediated by stable charged interactions of R712,  
143 T761 and K762 of the converter with E497, E500, Y501 and E504 of the  
144 relay. Additionally, the aliphatic chain of R712 forms a hydrophobic pocket with F709,  
145 F764, E500, Y501, E504 and I506 further stabilizing the interface. R712 was replaced  
146 with Leucine in the starting structure (PDB 6FSA), and a new simulation was initiated.  
147 Within 10 ns, the charge network was disrupted leaving a stable E504 to H760 and  
148 T761 backbone interaction and a transient Y501 to F709 interaction. The relay-  
149 converter interface subsequently opened 2-3 Å, allowing water molecules into the  
150 hydrophobic pocket. Following this disruption, the lever arm rotated away from the  
151 wildtype orientation towards the pointed end of a hypothetical actin filament (**Figure 2A,**  
152 **B, and Movie 2**). Intriguingly, these structural rearrangements result in the disruption of  
153 the binding region of the drug omecamtiv mecarbil, such that the first strand of the  $\beta$ -  
154 sheet in the converter would sterically clash with the drug in its wildtype binding site  
155 (**Movie 3**).

156 To further probe the mechanical effect of the R712L mutation, we performed  
157 steered molecular dynamics simulations (SMD) of the 100 ns equilibrated wildtype and  
158 mutant structures described above. Application of 70 pN force on the lever arm (see  
159 Methods) toward the pointed-end of a hypothetically bound actin filament resulted in a  
160 more substantial tilting of the mutant lever-arm helix than seen for the wildtype.  
161 Changes in the azimuthal rotation were also detected. Although quantitative information  
162 about the mechanical properties is not straightforwardly obtained from these

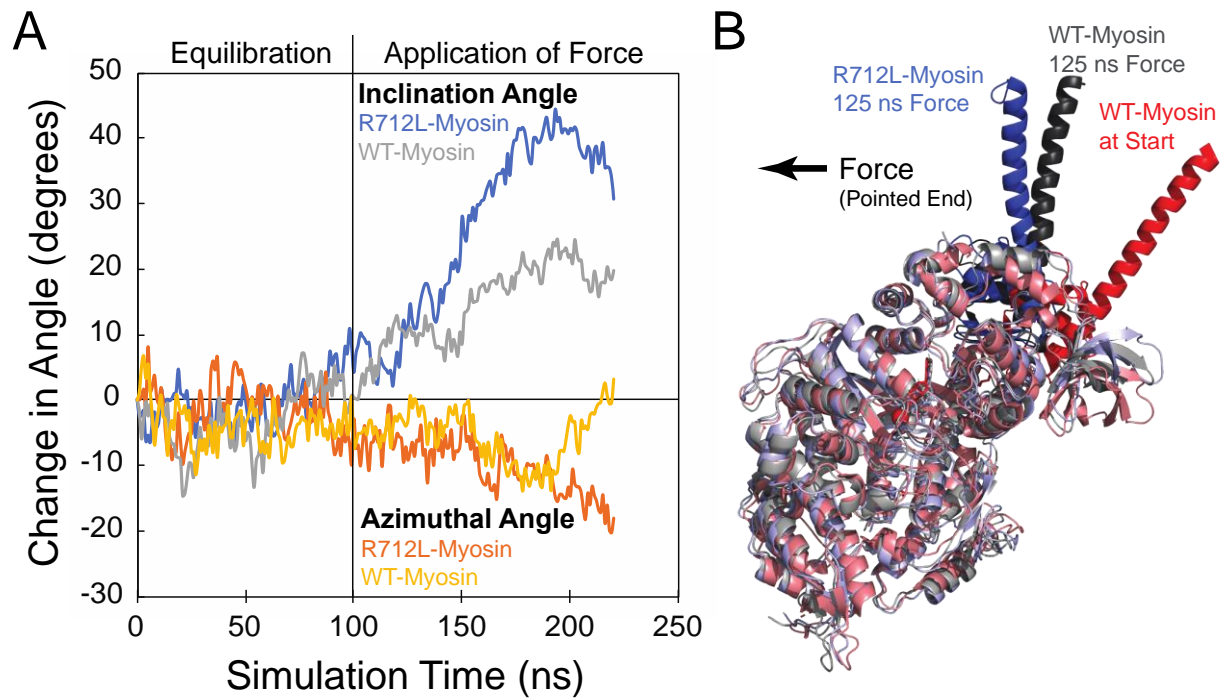

**Figure 2: The R712L mutation affects the coupling of the motor domain to the lever arm helix. (A)** Inclination and azimuthal angle positions of WT- and R712L-myosins during MD equilibration and SMD pulling simulations. Force is applied to the lever arm helix at 100 ns (see Methods). Each curve is the average of two independent simulations. **(B)** Simulated structures after pulling the lever-arm helix for 125 ns. To clearly show the lever-arm helix positions, light chains were removed and motor domain residues are shown in muted colors. The arrow shows the force vector, as pulling occurred toward the pointed-end and parallel to the long-axis of a hypothetical bound actin filament.

163 simulations, they show diminished mechanical coupling of the lever-arm to the motor  
164 domain in R712L.

165 We hypothesized that the inhibited motility of R712L results from a decreased  
166 working stroke due to disruption of the normal mechanical integrity. To experimentally  
167 probe the effect of the R712L mutation on the working stroke, we measured the kinetics  
168 of actin attachment durations and mechanics of single myosin molecules using an  
169 optical trapping instrument that can detect sub-nm displacements with ms temporal  
170 resolution [13]. We used the 3-bead optical trapping geometry in which a biotinylated  
171 actin filament is tethered between two laser-trapped 0.5  $\mu\text{m}$  dia. polystyrene beads  
172 coated with neutravidin, creating a bead-actin-bead dumbbell [20, 21]. The dumbbell is  
173 lowered onto a larger nitrocellulose-coated pedestal bead having our HMM constructs  
174 adsorbed at low enough concentration for single molecules to interact with the filament  
175 (see Methods for details). Single actomyosin binding events are detected by the  
176 decrease in covariance of the positions of the two dumbbell beads (**Figure 3A**—gray  
177 traces; see Methods).

178 WT-myosin actin-attachment events resulted in the decrease of the covariance  
179 signal and an observable displacement of the dumbbell due to the working stroke  
180 (**Figure 3A**—black trace). The average amplitude of the working stroke was determined  
181 by combining single-molecule interactions aligned at initial attachment times (time-  
182 forward ensemble averages) and detachment times (time-reversed averages) ([22];  
183 Methods). Time-forward ensemble averages (506 events, 5 molecules) in the presence  
184 of 1  $\mu\text{M}$  ATP revealed an initial 3.3 nm working-stroke displacement that is considered  
185 to be associated with phosphate release, followed by an exponential rise to 4.4 nm that

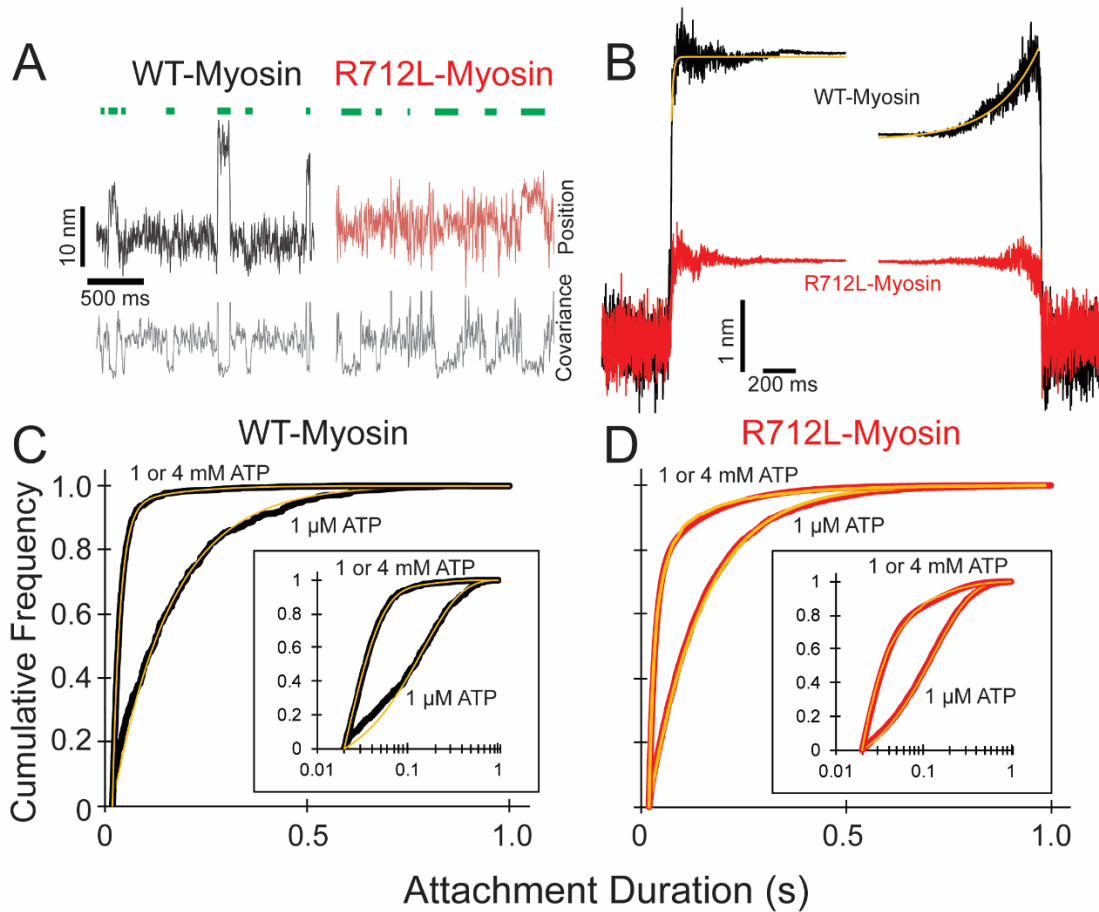

**Figure 3: R712L-myosin has a reduced working stroke compared to WT-myosin but normal attachment durations (A)** Optical trapping displacement and covariance traces showing the position of one bead during multiple interactions of WT- (black) and R712L- (red) myosins with the actin dumbbell. Green bars indicate binding events identified by decreases in bead covariance (gray traces; see Methods). An averaging window of 30 ms was used for covariance traces, and the position traces shown were smoothed to 5 ms to clarify the displacements. **(B)** Binding events were synchronized at their beginnings and ends and were averaged forward or backward in time, respectively. The average working stroke of R712L-myosin is substantially smaller than WT-myosin. WT-myosin has 2 clear steps in its working stroke, whereas substeps could not be resolved in R712L-myosin. Yellow lines are single exponential fits to the data. **(C and D)** Cumulative distributions of attachment durations for WT- **(C)** and R712L- **(D)** myosin at 1 μM and saturating MgATP. Inset shows the same data on a semi-log scale. For **(C)** and **(D)** yellow lines are fitted exponential distributions, where the 1 μM ATP data were well fit by single exponentials, and the saturating 1 & 4 mM ATP data were best described by the sum of two exponentials.

186 is consistent with a second displacement associated with ADP release (**Figure 3B**;  
187 [22]). These average displacements are similar to those reported previously for full  
188 length and HMM constructs of  $\beta$ -cardiac myosin [13]. A single exponential function was  
189 fit to the rising-phase of the time-forward ensemble average, yielding a rate constant ( $99$   
190  $\pm 4.2 \text{ s}^{-1}$ ; **Table 2 and Figure 3B**) that is similar to the biochemically measured rate of  
191 ADP release (**Table 1—supplement 2**). The rate of the rising phase of the time-  
192 reversed ensemble averages leading up to detachment ( $4.6 \pm 0.04 \text{ s}^{-1}$ ; **Figure 3B**) is  
193 consistent with the biochemical rate of ATP binding to nucleotide-free actomyosin at  $1$   
194  $\mu\text{M}$  ATP (**Table 1—supplement 3-4**).

195 In the corresponding experiment with R712L-myosin, the data traces revealed  
196 considerably smaller displacements than observed with WT-myosin (**Figure 3A, B—red**  
197 traces). Ensemble averaging of events detected via the covariance trace (3314 events,  
198 13 molecules) showed a drastically reduced R712L working stroke size of 1.3 nm. Not  
199 only did R712L-myosin have a small initial displacement, but unlike WT-myosin, R712L-  
200 myosin did not show a clear second step, as revealed by the similar displacements of  
201 the extension points in the time-forward and time-reversed ensemble averages. Thus,  
202 R712L does not have a detectable ( $<0.2 \text{ nm}$ ) second step (**Figure 3B—red trace**).

203 Displacement only occurs promptly upon strong-binding to actin.

204

### 205 **R712L has largely unchanged detachment rates**

206 Using the optical trap, we measured actin attachment durations (event lifetimes)  
207 of WT- and R712L-myosins in the presence of MgATP. The distributions of actin-bound  
208 durations were adequately fitted by single exponential functions for WT-myosin ( $6.9 \text{ s}^{-1}$ )

209 and R712L-myosin ( $7.6 \text{ s}^{-1}$ ) in the presence of  $1 \mu\text{M}$  MgATP (**Figure 3C, D, and Table**  
210 **3**). These rates are reasonably close to the biochemical rates ( $4.2$  and  $4.5 \text{ s}^{-1}$ ) expected  
211 for  $1 \mu\text{M}$  MgATP binding in solution (**Table 1—supplement 3-4**). At saturating MgATP  
212 ( $1$  or  $4 \text{ mM}$ ) the distributions of event lifetimes were best described by the sum of two  
213 exponentials as determined by log-likelihood ratio testing (**Figure 3C, D, and Table 3**;  
214 [23]). For WT-myosin, the dominant detachment rate at high MgATP concentration ( $54$   
215  $\text{s}^{-1}$ ) is within 1.4-fold of the MgADP release rate measured in solution ( $73 \text{ s}^{-1}$ ; **Table 1—**  
216 **supplement 2**) suggesting this kinetic step limits actin detachment under these  
217 conditions. A minor component in the lifetime distribution (at  $7.5 \text{ s}^{-1}$ ) was statistically  
218 significant, but comprised only 3% of the amplitude. The distribution of R712L-myosin  
219 actin attachment durations was also well described by the sum of two exponentials, with  
220 the predominant component ( $70 \text{ s}^{-1}$ ; **Figure 3D and Table 3**) similar to wildtype. This  
221 rate is  $> 2$ -fold slower than the biochemically determined rate of ADP release in solution  
222 ( $142 \text{ s}^{-1}$ ; **Table 1—supplement 3**), suggesting that a rate-limiting transition occurs  
223 before the ADP release step. The minor component (9%) had a similar rate ( $7.4 \text{ s}^{-1}$ ) as  
224 WT-myosin, but comprised a larger fraction of the total (**Table 3**). The presence of this  
225 slow component may explain the increased number of paused filaments observed in the  
226 motility assays (**Figure 1B**).

227

### 228 **Omecamtiv mecarbil rescues the motility of the R712L by restoring its working** 229 **stroke**

230 Crystal structures of myosin [11, 12] reveal that R712L is located near the  
231 binding pocket for omecamtiv mecarbil (OM), a drug in phase-3 clinical trials that

**Table 2:** Rates and displacement sizes of time forward and time reversed ensemble averages. Uncertainties are standard errors of the fit.

|                         | Ensemble Alignment | $k_{obs}$ ( $s^{-1}$ ) | Displacement (nm) |             |             |
|-------------------------|--------------------|------------------------|-------------------|-------------|-------------|
|                         |                    |                        | Total             | 1st Substep | 2nd Substep |
| WT:                     | Forward            | 99.1±4.17              | 4.41              | 3.32        | 1.09        |
|                         | Reverse            | 4.59±0.04              |                   |             |             |
| R712L                   | Forward            | N.D.                   | 1.29              | N.D.        | N.D.        |
|                         | Reverse            | N.D.                   |                   |             |             |
| R712L+OM (50 $\mu$ M):  | Forward            | 39.8±0.91              | 2.66              | 1.82        | 0.84        |
|                         | Reverse            | 9.61±0.07              |                   |             |             |
| R712L+OM (200 $\mu$ M): | Forward            | 41.8±0.06              | 3.42              | 2.28        | 1.14        |
|                         | Reverse            | 6.29±0.03              |                   |             |             |

\*Data are plotted in Figure 4C

**Table 3:** Exponential fits to attachment durations. Uncertainties are 95% confidence interval limits from bootstrapping.

|                         | ATP ( $\mu$ M) | $k_1$ ( $s^{-1}$ ) | $k_2$ ( $s^{-1}$ ) | A                   |
|-------------------------|----------------|--------------------|--------------------|---------------------|
| WT:                     | 1              | 6.89<br>+0.7/-0.6  | --                 | --                  |
|                         | 1000           | 54.4<br>+5.7/-4.8  | 7.5<br>+3.8/-2.4   | 0.97<br>+0.02/-0.01 |
| R712L:                  | 1              | 7.56<br>+0.3/-2.4  | --                 | --                  |
|                         | 1000           | 69.7<br>+9.0/-6.7  | 7.4<br>+1.2/-1.0   | 0.91<br>+0.01/-0.01 |
| R712 + OM (50 $\mu$ M): | 1              | 7.9<br>+0.3/-0.2   | --                 | --                  |
|                         | 1000           | 63.8<br>+7.8/-6.5  | 6.0<br>+1.9/-1.4   | 0.94<br>+0.08/-0.07 |

\*Data are plotted in Figure 3C-3D



232 increases cardiac ejection fraction in HCM patients [18]. Addition of OM decreased the  
233 *in vitro* actin filament gliding rate of WT-myosin (**Figure 4A**—black points, **Table 1**, and  
234 **Movie 1**), consistent with earlier measurements [11, 24-26] and with our previous report  
235 that OM inhibits  $\beta$ -cardiac myosin motility by suppressing its working stroke [13]. We  
236 expected that OM would further decrease the working stroke of R712 myosin. To our  
237 great surprise, however, addition of OM to R712L-myosin rescued motility in a  
238 concentration-dependent fashion (**Figure 4A**—red points, and **Movie 1**). At saturating  
239 OM concentrations, the actin gliding velocity driven by R712L-myosin ( $1.1 \pm 0.26 \mu\text{m}\cdot\text{s}^{-1}$ )  
240 was near the WT-myosin velocity in the absence of OM. The half-maximal  
241 concentration for activation of motility is  $30 \mu\text{M}$  which is considerably higher than the  
242  $\text{EC}_{50}$  for inhibition of WT-myosin ( $0.1 \mu\text{M}$ ). This result suggests that the R712L mutation  
243 affects the OM binding site, weakening the affinity. The addition of OM to R712L-  
244 myosin only moderately affects the kinetic parameters of the ATPase cycle. The  
245 exception is the value of  $K_{\text{TF}}$ , the half-saturation actin subunit concentration for  
246 activation of the ATPase, which increases with OM (**Table 1—supplement 1**).

247         Given the unexpected result that OM rescues gliding motility, we measured the  
248 R712L-myosin working stroke displacement and kinetics in the optical trap.  
249 Unidirectional displacements of the dumbbell upon R712L myosin-actin interaction were  
250 observed in the presence of OM. At  $50 \mu\text{M}$  and  $200 \mu\text{M}$  OM, the working stroke of  
251 R712L was increased to  $2.7 \text{ nm}$  and  $3.4 \text{ nm}$ , respectively (**Figure 4B, C**—light/dark blue  
252 traces, and **Table 2**). Detachment rates were independent of the OM concentration.  
253 Because the biochemical rate constants of the ATPase cycle for R712L-myosin were  
254 largely unchanged in the presence of OM (**Table 1—supplement 1-5**), the

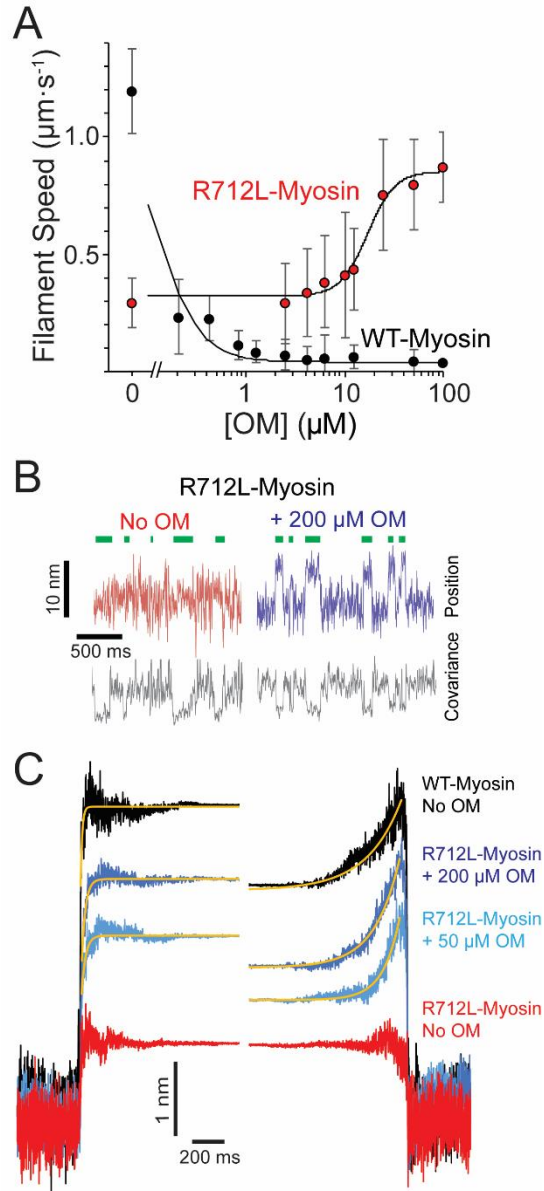

**Figure 4: Omecamtiv mecarbil rescues the working stroke of R712L-myosin despite suppressing the working stroke of WT-myosin** (A) The speeds of individual fluorescently labelled actin filaments were quantified in gliding filament motility assays for WT- (black) and R712L- (red) myosins as a function of OM concentration. Speeds sharply decreased for WT-myosin with increasing OM, while a partial rescue of motility was observed for R712L-myosin, at a higher  $EC_{50}$ . (B) Single molecule displacement and covariance traces showing R712L-myosin interactions with actin dumbbells in the absence (red) and presence (blue) of 200  $\mu\text{M}$  OM. Green bars indicate attachment events as detected by covariance (grey) decreases. Displacements were substantially larger upon addition of 200  $\mu\text{M}$  OM. (C) Ensemble averages of single-molecule interactions synchronized at event beginnings and averaged forward in time (left) or synchronized at event ends and averaged backward in time (right). The ensemble averages for WT- and R712L-myosins in the absence of OM are replotted from Figure 3 for comparison. Yellow lines are single-exponential fits to the data (Table 2).

255 concentration-dependent rescue of R712L-myosin motility can be attributed to  
256 restoration of the mechanical working stroke.

257 Ensemble averaging of events recorded with R712L-myosin in the presence of  
258 OM at 1  $\mu\text{M}$  MgATP revealed that the working stroke is composed of 2 substeps like  
259 WT myosin in the absence of OM. At 50  $\mu\text{M}$  OM, R712L-myosin exhibited a 1.8 nm  
260 prompt step followed by a 0.8 nm 2<sup>nd</sup> substep, (for a total working stroke of 2.7 nm). At  
261 200  $\mu\text{M}$  OM, R712L-myosin has a 2.3 nm first step followed by 1.1 nm 2<sup>nd</sup> substep (total  
262 working stroke: 3.4 nm) (**Figure 4C and Table 2**). The rising phases of time-forward  
263 averages fit a single exponential function with rates of 40-42  $\text{s}^{-1}$  at 50-200  $\mu\text{M}$  OM)  
264 (**Figure 4C-left**—yellow fitted curves, **and Table 2**), which is slower than observed with  
265 WT-myosin and substantially slower than the biochemically measured rate of ADP  
266 release (157  $\text{s}^{-1}$ ; Table 1). The rising phases of time-reversed ensemble averages were  
267 adequately fit by single exponential functions ( $\sim 6\text{-}10 \text{ s}^{-1}$  at 50-200  $\mu\text{M}$  OM), (**Figure 4C-**  
268 **right**—yellow fitted curves, **and Table 2**) consistent with ATP binding rates (**Table 1**).

269

### 270 **Rescue of R712L by OM is reversible**

271 To test whether rescue of the R712L working stroke by OM is reversible, we designed a  
272 flow chamber that allowed for the exchange of buffers in real time while maintaining the  
273 interrogation of single actomyosin interactions (**Figure 5A**). The experiment with R712L  
274 in Figure 5B was initiated in the presence of 50  $\mu\text{M}$  OM to obtain clear displacement  
275 events (**Figure 5B**—blue trace). After acquiring an adequate number of actomyosin  
276 events, the buffer was exchanged to remove the OM, carefully maintaining the pedestal  
277 position using a camera-based stage stabilization system [27, 28], and additional data

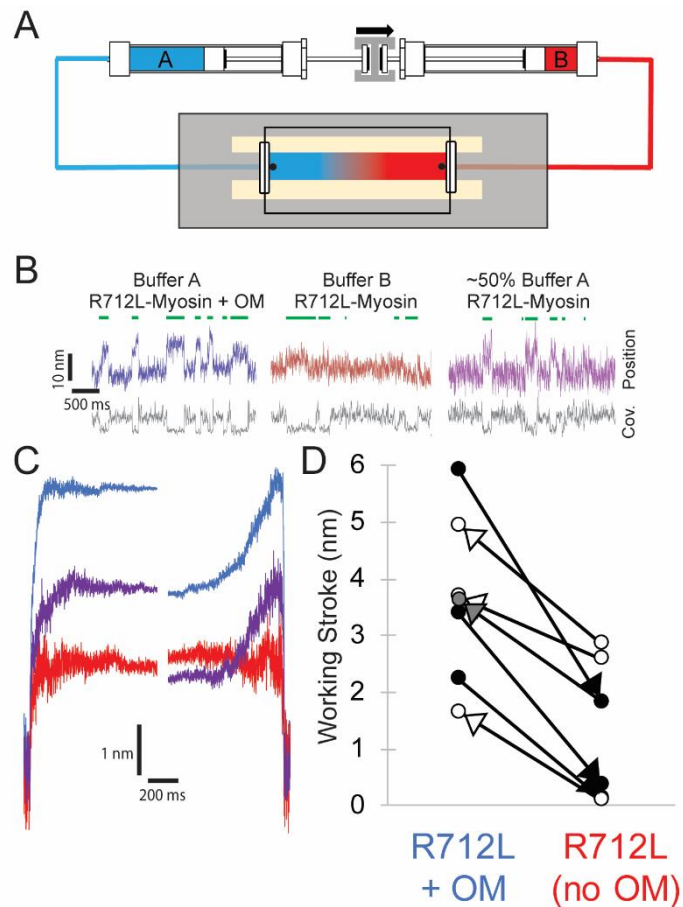

**Figure 5: Reversible rescue of a single R712L-myosin molecule by OM as revealed by real-time buffer exchange.** **(A)** Diagram of flow cell and back-to-back syringes used for buffer exchange experiments during optical trapping assays (see Methods). A single molecule is initially interrogated with “Buffer A” (blue) in the chamber, which is exchanged with “Buffer B” (red) at a rate of  $\sim 0.5 \text{ mm s}^{-1}$  via action of a push-pull syringe pump. Precise control of pushing and extracting the buffer, in addition to maintenance of the stage with positional feedback, allows analysis of the same molecule under different solution conditions. **(B)** Example traces of an individual myosin molecule under multiple buffer conditions. (Left, blue) The initial trace showing displacements in the presence of OM, followed by attachment events with smaller displacements in OM-free buffer (center, red), followed again by a partial rescue of working strokes as the OM-containing buffer reversed and re-entered the chamber (right, purple). **(C)** Ensemble averages of the molecule from (B), with a shortened working stroke upon washout of OM, and a partial rescue of the working stroke after partial re-addition of OM. **(D)** Working stroke amplitude in the presence and absence of OM from flow experiments. Each line represents the change in total observed working stroke via ensemble averaging of records from an individual molecule under multiple buffer conditions. Black arrowheads indicate experiments where Buffer A contained OM, and Buffer B lacked OM, and in each case a reduced working stroke was observed. White arrowheads indicate experiments where Buffer A lacked OM, and Buffer B contained OM. In each case addition of OM increased the working stroke. The gray arrowhead depicts the partial rescue experiment in which a mixture of buffer A and B was in the chamber after reversal of the flow.

278 were collected in the OM-free condition (**Figure 5B**—red trace). The working stroke  
279 decreased following the removal of the OM for all molecules tested (**Figure 5D**—black  
280 arrowheads). In the reverse experiment, collecting data first with an OM-free buffer, and  
281 then adding 50  $\mu\text{M}$  OM by exchanging the solution, we observed rescue of the working  
282 stroke following buffer exchange (**Figure 5D**—white arrowheads). Finally, we  
283 successfully switched buffers back and forth from 50  $\mu\text{M}$  OM to no OM, and partially  
284 back to the 50  $\mu\text{M}$  OM solution. The molecule illustrated started with clearly discernable  
285 working strokes in the presence of OM (**Figure 5B**—blue trace), which was attenuated  
286 in the absence of OM (**Figure 5B**—red trace), and then substantially rescued following  
287 partial re-addition of OM (**Figure 5B**—purple trace and **panel D**—gray arrowhead).  
288 Ensemble averaging of records from each of these molecules revealed 2 substeps in  
289 the working stroke in each case in the presence of OM; however, the same molecules  
290 measured in the absence of OM had working strokes with single steps as evidenced by  
291 similar extension points of the time-forward and time-reversed ensemble averages  
292 (**Figure 5C**). These buffer exchange assays reveal the reversibility of working stroke  
293 rescue by OM, and also very clearly show the loss of the 2<sup>nd</sup> substep in individual  
294 myosin molecules.

295 **DISCUSSION**

296 **HCM mutation, R712L, has reduced motility due to reduced working stroke**

297         In the present work we analyzed a recombinant  $\beta$ -cardiac myosin that contains a  
298 highly penetrant R712L mutation that causes severe HCM [9]. R712 is located in the  
299 converter region at the fulcrum of the lever arm in the myosin head and forms a salt  
300 bridge with relay helix E497, likely stabilizing the lever at a functionally crucial region of  
301 the motor and maintaining mechanical integrity when the converter and lever arm tilt  
302 (**Figure 1A and 2B**). Given the importance of this region in the mechanochemistry of  
303 myosin, we investigated the effect of the mutation on key steps of the actomyosin  
304 ATPase pathway, *in vitro* actin gliding, and the working stroke displacement and  
305 kinetics. R712L-myosin has a drastically reduced actin gliding rate and a markedly  
306 reduced mechanical working stroke, despite minimal alteration of rates of the  
307 biochemical steps in its actomyosin ATPase cycle. The suppressed working stroke  
308 explains the reduced filament gliding velocity, and presumably the suppressed cardiac  
309 performance in the disease. Molecular dynamics simulations support the concept that  
310 disruption of the R712-E497 salt bridge destabilizes the interaction between the  
311 converter domain and the relay helix thereby decoupling ATPase activity from work  
312 output.

313

314 **The working stroke of R712L-myosin is defective**

315         Ensemble averages of single R712L-myosin interactions show a substantially  
316 smaller average displacement (1.3 nm) compared to WT-myosin (4.4 nm; **Figure 2B**  
317 **and Table 2**). Importantly, averages of R712L-myosin do not reveal a 2-step working

318 stroke, but rather show a single, small displacement immediately upon actin attachment  
319 **(Figure 4C and 5C—red traces)**. Events synchronized at the end of attachment  
320 (reverse-ensemble averages) showed no kinetic rise before detachment, also  
321 supporting the absence of a 2<sup>nd</sup> sub-step **(Figure 4C)**. In WT-myosin, an initial  
322 displacement (~3-4 nm) occurs upon strong actin binding and precedes release of  
323 orthophosphate (P<sub>i</sub>) from actin-myosin-ADP-P<sub>i</sub> [29]. This step is followed by a 1-2 nm  
324 displacement that takes place upon release of ADP from actin-myosin-ADP, which  
325 confers force dependence of actin detachment [29-31]. Because the R712L-myosin  
326 produces its small working stroke immediately upon attachment, and the P<sub>i</sub> release rate  
327 measured in biochemical experiments is not inhibited **(Table 1)**, we propose that the  
328 small working stroke in the mutant is linked to P<sub>i</sub> release rather than to ADP release.  
329 However, the smaller displacement and the absence of a second step indicate that the  
330 normal coupling between the active site and lever arm is substantially diminished. An  
331 alternative hypothesis for the observed smaller average displacement is that myosin  
332 alternates between a state having a normal displacement and a state with a defective  
333 working stroke. However, we disfavor this possibility given that the ensemble averages  
334 reveal a one-step working stroke, rather than the sum of two reduced displacements  
335 **(Figure 3D and Table 3)**.

336

### 337 **R712L working stroke is rescued by omecantiv mecarbil despite little effect on** 338 **ATPase activity**

339 A remarkable finding of this study is that OM rescues the working stroke and  
340 actin gliding activity of R712L-myosin without substantially changing myosin's

341 biochemical kinetics (**Figure 4B, C, 5B-D, and Table 1**). OM was identified in a high-  
342 throughput screen designed to identify drugs that increase the rate of P<sub>i</sub> release from  
343 actomyosin-ADP-P<sub>i</sub>, with the goal of increasing the β-cardiac myosin duty ratio and  
344 heart contractility [15]. It was subsequently found that OM increases cardiac contractility  
345 by indirect activation of the muscle thin-filament [13, 14]. OM suppresses the working  
346 stroke of WT-myosin, similar to the effect of the R712L mutation. OM prolongs the  
347 actomyosin attachment time, which leads to cooperative sensitization of the thin  
348 filament regulatory system to Ca<sup>2</sup> thereby enhancing contraction [13, 32]. We termed  
349 this combination of effects SEPTA (Step Eliminated, Prolonged Time of Attachment;  
350 [13]).

351 We expected OM to have similar effects on R712L-myosin as it did in WT-  
352 myosin: to increase the rate of P<sub>i</sub> release from R712L-myosin and to further suppress  
353 the already defective actin gliding velocity and working stroke. However, we found  
354 rescue of actin gliding in the *in vitro* motility assay (**Figure 4A**) due to the near-complete  
355 recovery of the R712L-myosin working stroke (**Figure 4B, C**) with little change to the  
356 ATPase activity (**Table 1**).

357 Ten-fold higher OM concentrations were required to achieve rescue of R712L-  
358 myosin than to inhibit WT-myosin, suggesting the R712L mutation alters the OM affinity.  
359 Structural studies with WT-myosin found two different OM binding conformations that  
360 depend on whether the motor is in a pre-powerstroke or a post-powerstroke state, with  
361 a ten-fold tighter affinity for the pre-powerstroke state [11, 12]. R712 is a key  
362 component of the OM binding site in both conformations, with OM forming packing  
363 interactions and shielding the R712-E497 salt bridge in the lever-arm-converter region.



364 Biochemical kinetics experiments show that OM does not increase actin-  
365 activated phosphate release from R712L-myosin as found for WT-myosin (**Table 1**).  
366 This result suggests that OM may not bind to the pre-powerstroke state of R712L-  
367 myosin, which is the higher affinity state in WT-myosin. Thus, the higher EC<sub>50</sub> for  
368 R712L-myosin may be the result of a disrupted OM binding site thereby causing OM to  
369 bind only to the lower affinity post-powerstroke state. A surprising and counterintuitive  
370 finding of this study is that OM binding does not suppress the R712L working stroke,  
371 and it does not result in a prolonged time of attachment (SEPTA; [13]). We suggest that  
372 SEPTA is the result of binding of OM to the pre-powerstroke state of WT-myosin.

373 How does OM rescue the R712L-myosin working stroke? We propose that OM  
374 binds to post-powerstroke state of R712L-myosin at the same site as WT-myosin, and  
375 its presence restores the mechanical integrity of this junction, reconnecting biochemical  
376 and mechanical activity. Binding of OM to R712L-myosin not only increases the size of  
377 the initial displacement that occurs upon actin binding, it also rescues the second  
378 substep. MD simulations suggest that the R712L mutation may disrupt the OM binding  
379 site (**Movie 3**) and alter the rigid coupling between the converter/lever-arm and motor  
380 This mechanical disruption is prevented in the presence of OM, stabilizing the WT-like  
381 configuration needed for displacement and force generation.

382

### 383 **Rescue of R712L working stroke by OM is reversible**

384 Tests of the reversibility of the effects of OM on R712L-myosin were initially  
385 hampered by the large number of recordings necessary to obtain statistically reliable  
386 effects of adding and removing the drug in separate molecules. Intrinsic variability

387 among optical trap recordings of working stroke displacements and kinetics is inevitable  
388 due to the probabilistic nature of the mechanical strain at time of attachment, caused by  
389 Brownian fluctuations of the bead-actin-bead dumbbell and, possibly, due to protein  
390 heterogeneity [20, 33]. This problem prompted us to design a flow chamber that would  
391 enable exchange of buffers while continuing to analyze single actomyosin dumbbells.  
392 Exchange of solutions is commonly applied in other single molecule experiments, such  
393 as with DNA-binding proteins, where the sample can be moved into different flow  
394 streams [34, 35]. This method is not applicable to the actomyosin three-bead assay,  
395 however, because the pedestal bead containing the myosin is attached to the  
396 microscope slide.

397 By preparing chambers with highly parallel side walls and facilitating very smooth  
398 flow along the direction of the actin filament with a push-pull, stepper-motor driven  
399 syringe pump, we found that individual myosin molecules would continue to interact with  
400 the actin dumbbell through exchange of solutions and subsequently. The flow displaced  
401 the dumbbell slightly, in the amount expected from the Stokes drag at the fluid velocity,  
402 but the beads returned to their previous positions when the flow ended. This assay  
403 allowed us to unambiguously demonstrate that the defective working stroke of a single  
404 R712L myosin can be rescued by OM binding, and that this rescue is reversible.  
405 Notably, at the intermediate OM concentration examined ( $<50 \mu\text{M}$ ), the average  
406 displacement of a single R712L-myosin molecule was in between the values obtained in  
407 the absence and presence of  $50 \mu\text{M}$  OM, which suggests that OM was binding and  
408 dissociating during the acquisition of the trace. To our knowledge, this is the first  
409 successful exchange of solutions while maintaining interrogation of an individual

410 actomyosin pair with the three-bead assay. Further microfluidic improvements to the  
411 flow chamber should provide for more rapid comparison of conditions with increased  
412 statistical power.

413

#### 414 **The R712L mutation and hypertrophic cardiomyopathy**

415 The R712L mutation very clearly results in suppression of motor function by  
416 uncoupling the ATPase activity of the myosin from its working stroke. We would expect  
417 that the contractility powered by a thick filament that contains R712L-myosins would  
418 exhibit decreased sliding velocity, force, and power output. Thus, simply considering  
419 the myosin activity, the R712L mutation does not fit into the paradigm expressed for  
420 several other mutations in which HCM mutations result in gain-of-function contractility  
421 [5].

422 Although a mechanism is not apparent, it is possible that in the context of the  
423 sarcomere of a heterozygous individual, the R712L mutation could result in a gain of  
424 function. As discussed above, we recently discovered that although OM inhibits the  
425 myosin power stroke and kinetics, at therapeutic concentrations it may act as a thin-  
426 filament sensitizer, allowing increased overall contractility at lower calcium  
427 concentrations [13, 14]. Likewise, R712L-myosin could conceivably confer activating  
428 properties through the thin filament, or perhaps through activation of other myosins from  
429 the thick filament, although no mechanisms for those are apparent. A more likely  
430 possibility is that the gain-of-function concept is not universal in HCM.

431 **CONCLUSIONS**

432 We found that mutation of R712 to leucine leads to a defective working stroke in  $\beta$ -  
433 cardiac myosin, perhaps leading to defective cardiac contraction in this variant of HCM.  
434 Omecamtiv mecarbil rescues the defective working stroke of the mutant and this  
435 surprising effect of OM is reversible upon exchanging buffers in individual myosin-actin  
436 dumbbell interaction sites.

437

438 Acknowledgements: The work was supported by NIH grants R01-HL133863 to EF,  
439 DAW, and EMO, R35GM118139 to YEG, S10OD023592 to Dr. Kim Sharp (University of  
440 Pennsylvania), and NSF grant CMMI:15-48571 to YEG and EMO. We thank Drs.  
441 Michael Woody and Serapion Pyrpasopoulos for help with the optical trap and for  
442 useful discussions.

## 443 **MATERIALS AND METHODS**

444

### 445 **PROTEIN EXPRESSION AND PURIFICATION**

#### 446 **Adenovirus manipulation**

447         The human  $\beta$ -cardiac HMM (cHMM) encodes residues 1-1137 of the *MYH7* gene  
448 (GenBank: AAA51837.1) with a FLAG tag added on the C-terminus (1138-1146) of the  
449 S2 domain. The cHMM cDNA was cloned into the pShuttle-IRES-hrGFP-1 vector  
450 (Agilent Tech., Santa Clara, CA) and an AdcHMM-Flag virus was prepared and  
451 amplified for expression of cHMM protein in C2C12 cells [36]. The virus was expanded  
452 by infection of a large number of plates of confluent Ad293 cells at multiplicity of  
453 infection (MOI) of 3-5. The virus was harvested from the cells and purified by CsCl  
454 density sedimentation yielding final virus titers of  $10^{10}$ - $10^{11}$  plaque forming units per mL  
455 (pfu·mL<sup>-1</sup>).

456

#### 457 **Muscle cell expression and purification of $\beta$ -cardiac HMM**

458         Maintenance of the mouse myogenic cell line, C2C12 (CRL 1772; American  
459 Type Culture Collection, Rockville, MD), has been described in detail elsewhere [37,  
460 38]. Confluent C2C12 myoblasts were infected with replication defective recombinant  
461 adenovirus (AdcHMM-Flag) at  $2.7 \times 10^8$  pfu·mL<sup>-1</sup> in fusion medium (89% DMEM, 10%  
462 horse serum, 1% FBS). Expression of recombinant cHMM was monitored by  
463 accumulation of co-expressed GFP fluorescence in infected cells. Myocyte  
464 differentiation and GFP accumulation were monitored for 216 – 264 h after which the  
465 cells were harvested. Cells were chilled, media removed, and the cell layer was rinsed

466 with cold PBS. The cell layer was scraped into Triton extraction buffer: 100 mM NaCl,  
467 0.5% Triton X-100, 10 mM Imidazole pH 7.0, 1 mM DTT, 5 mM MgATP, and protease  
468 inhibitor cocktail (Sigma, St. Louis). The cell suspension was collected in an ice-cold  
469 Dounce homogenizer and lysed with 15 strokes of the tight pestle. The cell debris in the  
470 whole cell lysate was pelleted by centrifugation at 17,000 x g for 15 min at 4°C. The  
471 Triton soluble extract was fractionated by ammonium sulfate precipitation using  
472 sequential steps of 0-30% saturation and 30-60% saturation. The cHMM precipitates  
473 between 30-60% saturation of ammonium sulfate. The recovered pellet was dissolved in  
474 and dialyzed against 10 mM Imidazole, 150 mM NaCl, pH 7.4 for affinity purification of  
475 the FLAG-tagged cHMM on M2 mAb-Sepharose beads (Sigma). Bound cHMM was  
476 eluted with 0.1 mg·mL<sup>-1</sup> FLAG peptide (Sigma). Protein was concentrated and buffer  
477 exchanged on Amicon Ultracel-10K centrifugal filters (Millipore; Darmstadt, Germany),  
478 dialyzed exhaustively into 10 mM MOPS, 100 mM KCl, 1 mM DTT before a final  
479 centrifugation at 300,000 x g for 10 min at 4°C. Aliquots were drop frozen in liquid  
480 nitrogen and stored in vapor phase at -147°C.

481

#### 482 **SDS PAGE and LC/MS/MS sequence analysis of the expressed cHMM**

483 Purified wildtype human  $\beta$ -cHMM and R712L HCM variants were routinely  
484 analyzed by SDS PAGE (**Figure 1—supplement 1**). The purified proteins, which we  
485 call WT-myosin and R712L-myosin, consist of a 132 kDa heavy chain and associated  
486 myosin light chains LC1 and LC2. The protein sequence of the expressed WT- and  
487 R712L-myosins were determined by LC/MS/MS analysis of independent trypsin and  
488 chymotrypsin digests of wildtype and mutated proteins. The peptide coverage was

489 complete and comparable for each protein from the N-terminal acetylated glycine  
490 through the C-terminal Flag-tag (2 – 1146) and differed only in the unique peptides that  
491 confirm the single residue substitutions distinguishing the wildtype and the mutated  
492 proteins.

493

## 494 **Reagents**

495 Actin was purified from rabbit skeletal muscle [39]. Native porcine cardiac thin filaments  
496 (TFs) were prepared according to the procedure of Spiess et al [40] as modified by  
497 Matsumoto et al, [41]. ATP and ADP were purchased from Sigma-Aldrich. Omecamtiv  
498 mecarbil (CK-1827452) was purchased from Selleck Chemicals. A 20 mM stock  
499 solution of OM was prepared in dimethyl sulfoxide (DMSO) and aliquots were stored at -  
500 80°C. *N*-[2-(1-maleimidyl)ethyl]-7-(diethylamino)coumarin-3-carboxamide labeled  
501 phosphate binding protein (MDCC-PBP) was prepared according to Brune et al. [42].

502

## 503 **MOTILITY ASSAYS**

504 Measurement of *in vitro* gliding filament motility of human  $\beta$ -cardiac HMM was done as  
505 previously described [11]. Briefly,  $\beta$ -cHMM was bound to nitrocellulose coated  
506 coverslips for 2 min, loading at 10 – 100  $\mu\text{g}\cdot\text{mL}^{-1}$ . The surfaces were blocked with 1%  
507 bovine serum albumin in PBS for 5 minutes. Motility was measured in a 12- $\mu\text{l}$  assay  
508 chamber in motility buffer (25 mM Imidazole, 25 mM KCl, 4 mM  $\text{MgCl}_2$ , 7.5 mM MgATP,  
509 0.5% methyl cellulose, 0.1  $\text{mg}\cdot\text{mL}^{-1}$  glucose oxidase, 0.018  $\text{mg}\cdot\text{mL}^{-1}$  catalase, 2.3  
510  $\text{mg}\cdot\text{mL}^{-1}$  glucose and 5 mM DTT, pH 7.6) containing 1 nM phalloidin–rhodamine-  
511 labelled actin (rhodamine-phalloidin: Sigma). To titrate the effect of the drug on motility,

512 a 2.5-mM stock of OM (CK-1827452) in dimethylsulphoxide (DMSO) was serially diluted  
513 with DMSO before a final 1/200 final dilution into motility buffer containing the  
514 rhodamine-labelled actin. The 0.5% DMSO in the assay buffer had no effect on motility  
515 in the absence of drug. The chamber was observed with a temperature-controlled stage  
516 and objective set at 32 °C on an upright microscope with an image-intensified charge-  
517 coupled device camera capturing data to an acquisition computer at 5–30 fps.  
518 dependent on assay parameters. Movement of actin filaments from 500 to 1,000 frames  
519 of continuous imaging was analyzed with semi-automated filament tracking programs as  
520 previously described [43, 44]. The trajectory of every filament with a lifetime of at least  
521 10 frames was determined; the instantaneous velocity of the filament moving along the  
522 trajectory, the filament length, the distance of continuous motion and the duration of  
523 pauses were tabulated. A weighted probability of the actin filament velocity for hundreds  
524 of events was fit by a Gaussian distribution and reported as a mean velocity and SD for  
525 each experimental condition.

526

## 527 **BIOCHEMICAL CHARACTERIZATION**

### 528 **Thin filament activated steady-state ATPase measurements**

529 Steady-state ATPase activity was measured by an NADH coupled assay as described  
530 previously [45]. Addition of DMSO (0.25-2%) had no effect on the rates.

531 Measurements with thin filaments were carried out at  $pCa < 4$  (100  $\mu$ M Ca) and the KCl  
532 concentration was kept  $< 0.05$  mM. The ATPase activity with thin filaments alone was  
533 subtracted from the data obtained in the experiments which were done with myosin plus  
534 thin filaments.



535

## 536 **Stopped-flow experiments**

537 All stopped-flow measurements were performed at 20°C using a Hi-tech Scientific SF-  
538 61SX2 stopped-flow system equipped with a 75 W mercury-xenon arc lamp. Single  
539 mixing experiments resulted in 1:2 dilution of myosin or actomyosin +/- ADP and a 1:2  
540 dilution of nucleotide in the flow cell in a buffer containing 5 mM MOPS (pH 7.2), 2 mM  
541 MgCl<sub>2</sub>, 25 mM KCl. In double mixing experiments myosin and ATP were mixed,  
542 allowed to incubate for the desired time and then mixed with thin filaments to give 1:4  
543 dilution of myosin and nucleotide and 1:2 dilution of thin filaments in the flow cell in a  
544 buffer containing 5 mM MOPS (pH 7.2), 2 mM MgCl<sub>2</sub>, 10 mM KCl. All syringes  
545 contained either 0.25% DMSO or 50 µM omecamtiv mecarbil. Light scattering was  
546 measured by using an excitation wavelength of 432 nm and a 400 nm longpass filter.  
547 Tryptophan fluorescence experiments utilized excitation at 295 nm and emission was  
548 selected with a 320-380 nm bandpass filter. Phosphate dissociation from the thin  
549 filament myosin ADP-P<sub>i</sub> complex was measured using MDCC-PBP as described by  
550 White et al. [46] with excitation wavelength of 434 nm and a 455 nm longpass filter.  
551 Background P<sub>i</sub> was removed by including a phosphate mop consisting of 0.10 mM 7-  
552 methylguanosine and 0.02 units·mL<sup>-1</sup> purine-nucleoside phosphorylase (Sigma; St.  
553 Louis, MO) in all of the reaction solutions. Thin filament and myosin solutions were  
554 extensively dialyzed (>3 times against a 1000-fold volume of buffer). The pH of buffers  
555 used in phosphate dissociation experiments was adjusted by adding 1N sodium  
556 hydroxide after which a small sample of buffer was used to determine the pH then  
557 discarded to avoid contaminating the buffer with phosphate from the pH.

558

## 559 **Data analysis and kinetic simulation of stopped-flow data**

560 Three to four data sets of 1024 point recordings were averaged, and the  
561 observed rate constants were obtained by fitting one or two exponential equations to the  
562 data using the TgK Scientific Kinetic Studio 5.10 software package included with the Hi-  
563 tech stopped-flow instrument.

564

## 565 **FLOW CELLS AND OPTICAL TRAPPING**

### 566 **Flow cell chambers**

567 We constructed flow cell chambers with double-sided tape and vacuum grease  
568 as previously described [21]. Briefly, the surface of the coverslip was coated with a  
569 0.1% nitrocellulose solution (Electron Microscopy Sciences) mixed with 2.47  $\mu\text{m}$   
570 diameter silica beads. Nitrocellulose was allowed to dry on the coverslip for at least 30  
571 minutes, and the coverslips were used within 24 hours of preparation or were stored in  
572 vacuum-sealed bags at 4°C until further use. To define 2 walls of the flow cell, two strips  
573 of double-sided tape were placed 0.5 cm apart onto the glass coverslip, and then a 1  
574 mm thick glass slide was placed onto the tape and carefully sealed.

575 Trapping Buffer (25 mM KCl, 60 mM MOPS, 1 mM DTT, 1 mM MgCl<sub>2</sub>, 1mM  
576 EGTA) was used as the solvent for all components in the optical trapping assay, unless  
577 otherwise noted.  $\beta$ -cardiac myosin variants were stored and diluted in trapping buffer  
578 with 300 mM added KCl. Cardiac myosin was added to the chamber and allowed to  
579 nonspecifically adsorb to the nitrocellulose surface for 30 seconds. The loading  
580 concentration of  $\beta$ -cardiac myosin ranged between 0.02 and 0.1  $\mu\text{g}\cdot\text{mL}^{-1}$ , and was

581 adjusted daily such that 1 of 3-5 locations tested showed clear interactions with the  
582 actin dumbbell. Immediately following the 30-second myosin incubation, chambers were  
583 blocked with two, 3-min incubations of 1 mg·mL<sup>-1</sup> bovine serum albumin (BSA).  
584 Following blocking, trapping buffer was added to the chamber with indicated amounts of  
585 MgATP, 50-200 μM omecamtiv mecarbil in DMSO (or 0.5-2% DMSO for control  
586 experiments), and 0.1-0.25 nM rabbit skeletal actin filaments polymerized with 10-15%  
587 biotinylated actin (Cytoskeleton) and stabilized by rhodamine-phalloidin (Sigma) at 1.1-  
588 1.2 molar ratio with actin monomers. 100x stocks of glucose oxidase + catalase (GOC)  
589 were freshly prepared by centrifuging catalase from bovine liver (Sigma) at 15000 x g  
590 for 1 minute, and adding 2 μl of catalase supernatant to 20 μl of 19.1 U·μL<sup>-1</sup> of glucose  
591 oxidase (Sigma). Immediately prior to addition of trapping buffer to the chamber, 1 μL of  
592 250 mg·mL<sup>-1</sup> of glucose and 1 μL of 100X GOC were added to 98 μl of trapping buffer  
593 (for final amount of 1X GOC solution and 2.5 mg·mL<sup>-1</sup> glucose) [21]. Low ATP  
594 concentrations were verified by absorbance at 259-nm (extinction coefficient: 15.4 x 10<sup>-3</sup>  
595 M<sup>-1</sup>cm<sup>-1</sup>). 0.4 ng of 500 nm diameter polystyrene beads (Polysciences) were coated with  
596 5 mg·mL<sup>-1</sup> neutravidin solution (Thermo Fisher) overnight at 4°C. 3 μL of coated beads  
597 were added to one side of the chamber. After addition of the assay components, the  
598 flow cell was sealed with vacuum grease. For flow cells used in the buffer exchange  
599 experiments, a thin layer of UV-curable resin (Loon) was brushed onto the top of the  
600 vacuum grease and cured for 5-10 seconds with an ultraviolet lamp to reduce leakiness  
601 of the chambers under flow.

602

603 **Optical trapping assay**

604           Optical trapping experiments were performed as previously described [13] in a  
605 dual-beam optical trap with a 1064 nm trapping laser. A Nikon Plan Apo x60 water  
606 immersion objective (NA 1.2) and Nikon HNA oil condenser lens were used in the  
607 microscope. Force detection was measured directly with quadrant photodiode detectors  
608 (JQ-50P, Electro Optical Components Inc.) with high voltage reverse bias with an  
609 amplifier custom built for our setup [28]. Two beams were produced by a polarizing  
610 beam splitter. The 500 nm beads were trapped, one in each beam, approximately 5  $\mu\text{m}$   
611 apart with trap stiffness of 0.05 – 0.07 pN·nm<sup>-1</sup> (as calculated via the power spectrum of  
612 each bead). Next, a fluorescently labelled actin filament of approximate length ~5-10  $\mu\text{m}$   
613 was tethered between the two beads. A pretension of ~3-5 pN was applied to the actin  
614 filament, and this bead-actin-bead “dumbbell” was used to search for the presence of  $\beta$ -  
615 cardiac myosin on pedestal beads. Interactions with  $\beta$ -cardiac myosin could be detected  
616 by both a decrease in covariance of the two bead positions and power stroke deflection  
617 of the beads within the trap. Once a putative molecule was identified, the dumbbell was  
618 carefully positioned over the molecule such that it produced maximal deflections and  
619 interacted with the greatest frequency, and this position was maintained by a feedback  
620 system that stabilized the position of the stage based on images of the pedestal beads.  
621 We used custom-built programs (Labview, Matlab) to acquire data and calculate the  
622 feedback signal at 250 kHz. During acquisitions, we manually adjusted the position of  
623 the stage in steps of 6 nm axially along the dumbbell between acquisition traces to  
624 ensure even accessibility of actin-attachment target zones.

625

## 626 **Optical trap data analysis**

627 We analyzed the optical trap data from force signals of the 2 beads as previously  
628 described [13, 21, 22]. Briefly, we detected events by calculating the covariance of the  
629 two beads' positions using an averaging window of 20-30 ms. The distribution of  
630 covariances from a 15 s recording of myosin interactions was well described by two  
631 Gaussian distributions. The first Gaussian peak at the lower covariance value is  
632 associated with the bound state of the actin dumbbell to the myosin molecule, while the  
633 second peak at higher covariance represented the covariance of the dumbbell beads  
634 while myosin was deattached. The minimum detectable event time for each molecule  
635 studied (the dead time) is determined to be half of the covariance averaging window.  
636 This window was adjusted to be as low as possible while maintaining separation  
637 between bound and unbound peaks such that the unbound peak mean minus its  
638 standard deviation was greater than the bound peak plus its standard deviation.  
639 Molecules where this separation could not be achieved were not analyzed further.

640 Actomyosin binding events were identified and refined in a two-step process:  
641 First, in order to minimize false positives, events were selected where the covariance  
642 crossed from the average unbound covariance peak to the average of the bound  
643 covariance peak and back again. The start and end times were initially recorded where  
644 the covariance signal first crossed the average bound and unbound values,  
645 respectively. Next, as the covariance signal is a slightly delayed indicator of attachment  
646 and detachment, the event start was further refined by determining when the covariance  
647 trace first crossed below the value halfway between the bound and unbound peaks near  
648 the initial beginning marker of each event. "Near" the originally detected event was  
649 defined as within 1.5x the instrument dead time or within the duration of the detected

650 event, whichever was smaller. Event ends were refined similarly to the event  
651 beginnings, that the refined event ends were marked at to the first point in time at which  
652 the covariance trace crossed above 80% of the way back toward the unbound peak. For  
653 display and further calculation, event starts and ends were shifted minus or plus  $0.75 \times$   
654 the dead time, respectively, to account for the effects of calculating the covariance using  
655 the finite averaging window.

656

657 Event durations were defined as the interval between these refined start and end times.  
658 Events shorter than the calculated instrument dead time were excluded from analysis.  
659 Ensemble averages were performed by aligning events at their refined beginnings  
660 (time-forward ensemble averages) or at their refined ends (time-reversed ensemble  
661 averages). To facilitate the averaging of events with various lengths, the displacement  
662 values for each of the interactions were extended forward or backward in time using the  
663 displacement of the interaction immediately before the event end or after the event start  
664 for time-forward and time-reversed ensemble averages, respectively. The total working  
665 stroke size was determined by subtracting the minimum position of the beads  
666 immediately prior to attachment from the time-forward extensions. The minimum value  
667 of the trace was determined with an 8 ms averaging window within  $\pm 0.2$  s of the  
668 detected event start. The second substep of actomyosin displacement was determined  
669 by subtracting the total step size from the averaged extensions of the time-reversed  
670 ensemble averages. Signals were weighted such that each molecule contributed  
671 equally to averages.

672

673 **Attachment duration and step size parameter estimation**

674 As previously described, we used MEMLET to estimate detachment rates and mean  
675 step sizes [23], which allowed us to perform maximum-likelihood estimation without the  
676 need for binning. Only molecules which had > 75 events were included in analysis.

677

678 **Buffer exchange experiments**

679 Buffer exchange optical trapping experiments were performed as above, except custom  
680 flow chambers were used instead of fully sealed chambers. Holes were drilled in the 1  
681 mm glass slides using a diamond-tipped drill bit, and PEEK tubing was inserted into the  
682 holes and sealed with UV-cured resin (Loon). Following insertion of the PEEK tubing,  
683 we used a razor blade to trim the tubing carefully to ensure the tubing was flush with the  
684 inner plane of the glass slide. Buffer A was used in the chamber, and a 2<sup>nd</sup> buffer,  
685 “buffer B”, was prepared in a syringe and attached via PEEK tubing to the flow cell.  
686 Buffer B was the same as buffer A, but contained a different dependent (i.e. if Buffer A  
687 contained OM, Buffer B contained background DMSO, and *vice-versa*). Volumes were  
688 carefully measured for each flow cell by addition of buffer A prior to sealing the  
689 chamber, and these volumes were used to adjust the flow rate of the syringe pump. The  
690 entrance syringe was loaded onto the “infuse” side of a continuous flow push-pull  
691 syringe pump (KD scientific 260 Legacy), and an oppositely oriented exit syringe was  
692 loaded onto the “withdraw” side of the syringe pump. Data were first acquired with  
693 buffer A in the chamber, then the syringe pump was turned on to create a flow of ~1-1.5  
694 mm·s<sup>-1</sup>, and due to the simultaneous motion of “infuse” and “withdraw” syringes, the  
695 buffer was gently exchanged with no change in pressure or volume. To fully exchange

696 buffers, 2 full chamber volumes were flowed. After exchange, the pump was switched  
697 off, and acquisitions were restarted with the dumbbell in the same position over the  
698 pedestal bead. In the experiment where we partially reversed flow (**Figure 5B, C**), the  
699 flow of the syringe pump was reversed flowing back 1.5 chamber volumes so that the  
700 chamber contained a mixture of Buffer A and Buffer B. Then data were acquired on the  
701 same molecule.

702

### 703 **MOLECULAR DYNAMICS SIMULATIONS SETUP AND ANALYSIS**

704 The starting conformation for molecular dynamics (MD) simulations was the crystal  
705 structure of the post-rigor conformation of  $\beta$ -cardiac myosin, PDB file 6FSA. MD and  
706 steered MD (SMD) simulations were performed with the GPU based NAMD package [47].  
707 The CHARMM36 parameter set was used for the protein [48] and TIP3P model for the  
708 water molecules [49]. With all other atoms fixed, the waters were energy minimized for  
709 20 ps and equilibrated with a NVT [constant number (N), volume (V), and temperature  
710 (T)] run for 1.0 ns at 320 K. The full model was then minimized for 20 ps in 1 fs steps and  
711 then equilibrated at constant NPT [constant number (N), pressure (P), and temperature  
712 (T)], 1.0 ATM (1.01325 bar) and 320 K for 100 ns without constraints.

713 SMD simulations were performed at constant NPT, 1.0 ATM and 320 K for 125 ns  
714 with the actin binding loops of the  $\beta$ -cardiac myosin (residue numbers: 363-376, 401-415,  
715 540-544, 557-577 and 623-647) fixed and steering force applied to the C $\alpha$  atom of heavy  
716 chain residue 788 at the center of the essential light chain binding domain. The direction  
717 of the applied force was along the direction of a hypothetical bound actin filament as  
718 determined by aligning the cardiac myosin of the last frame of the equilibration with a high



719 resolution cryoEM structure of rigor myosin 1b bound to actin, 6C1H [50]. The system  
720 involves a total of ~187k atoms in a 9.5 x 8.4 x 16.2 nm<sup>3</sup> solvent box with free K<sup>+</sup> and Cl<sup>-</sup>  
721 concentrations of 150 mM.

722         Angular positions of the myosin lever arm were determined using the colvars  
723 module [51] of VMD [52] and colvar functions (components) *tilt*, for the axial angle and  
724 *spinAngle* for azimuthal rotation.

## 725 REFERENCES

- 726 1. Marian, A.J. and E. Braunwald, *Hypertrophic Cardiomyopathy: Genetics, Pathogenesis, Clinical*  
727 *Manifestations, Diagnosis, and Therapy*. *Circ Res*, 2017. **121**(7): p. 749-770.
- 728 2. Spudich, J.A., *Hypertrophic and dilated cardiomyopathy: four decades of basic research on*  
729 *muscle lead to potential therapeutic approaches to these devastating genetic diseases*. *Biophys*  
730 *J*, 2014. **106**(6): p. 1236-49.
- 731 3. Homburger, J.R., et al., *Multidimensional structure-function relationships in human beta-cardiac*  
732 *myosin from population-scale genetic variation*. *Proc Natl Acad Sci U S A*, 2016. **113**(24): p. 6701-  
733 6.
- 734 4. Spudich, J.A., *The myosin mesa and a possible unifying hypothesis for the molecular basis of*  
735 *human hypertrophic cardiomyopathy*. *Biochem Soc Trans*, 2015. **43**(1): p. 64-72.
- 736 5. Spudich, J.A., *Three perspectives on the molecular basis of hypercontractility caused by*  
737 *hypertrophic cardiomyopathy mutations*. *Pflugers Arch*, 2019. **471**(5): p. 701-717.
- 738 6. Ujfalusi, Z., et al., *Dilated cardiomyopathy myosin mutants have reduced force-generating*  
739 *capacity*. *J Biol Chem*, 2018. **293**(23): p. 9017-9029.
- 740 7. Vera, C.D., et al., *Myosin motor domains carrying mutations implicated in early or late onset*  
741 *hypertrophic cardiomyopathy have similar properties*. *J Biol Chem*, 2019. **294**(46): p. 17451-  
742 17462.
- 743 8. Deacon, J.C., et al., *Identification of functional differences between recombinant human alpha*  
744 *and beta cardiac myosin motors*. *Cell Mol Life Sci*, 2012. **69**(13): p. 2261-77.
- 745 9. Sakthivel, S., et al., *A novel missense mutation (R712L) adjacent to the "active thiol" region of the*  
746 *cardiac beta-myosin heavy chain gene causing hypertrophic cardiomyopathy in an Indian family*.  
747 *Hum Mutat*, 2000. **15**(3): p. 298-9.
- 748 10. Kronert, W.A., et al., *A failure to communicate: Myosin residues involved in hypertrophic*  
749 *cardiomyopathy affect inter-domain interaction*. *J Biol Chem*, 2015. **290**(49): p. 11.
- 750 11. Winkelmann, D.A., et al., *Structural basis for drug-induced allosteric changes to human beta-*  
751 *cardiac myosin motor activity*. *Nat Commun*, 2015. **6**: p. 7974.
- 752 12. Planelles-Herrero, V.J., et al., *Mechanistic and structural basis for activation of cardiac myosin*  
753 *force production by omecamtiv mecarbil*. *Nat Commun*, 2017. **8**(1): p. 190.
- 754 13. Woody, M.S., et al., *Positive cardiac inotrope omecamtiv mecarbil activates muscle despite*  
755 *suppressing the myosin working stroke*. *Nat Commun*, 2018. **9**(1): p. 3838.
- 756 14. Governali, S., et al., *Orthophosphate increases the efficiency of slow muscle-myosin isoform in*  
757 *the presence of omecamtiv mecarbil*. *Nat Commun*, 2020. **11**(1): p. 3405.
- 758 15. Malik, F.I., et al., *Cardiac myosin activation: a potential therapeutic approach for systolic heart*  
759 *failure*. *Science*, 2011. **331**(6023): p. 1439-43.
- 760 16. Teerlink, J.R., et al., *Chronic Oral Study of Myosin Activation to Increase Contractility in Heart*  
761 *Failure (COSMIC-HF): a phase 2, pharmacokinetic, randomised, placebo-controlled trial*. *Lancet*,  
762 2016. **388**(10062): p. 2895-2903.
- 763 17. Cleland, J.G., et al., *The effects of the cardiac myosin activator, omecamtiv mecarbil, on cardiac*  
764 *function in systolic heart failure: a double-blind, placebo-controlled, crossover, dose-ranging*  
765 *phase 2 trial*. *Lancet*, 2011. **378**(9792): p. 676-83.
- 766 18. Teerlink, J.R., et al., *Omecamtiv Mecarbil in Chronic Heart Failure With Reduced Ejection*  
767 *Fraction: Rationale and Design of GALACTIC-HF*. *JACC Heart Fail.*, 2020. **8**(4): p. 12.
- 768 19. Robert-Paganin, J., et al., *Force Generation by Myosin Motors: A Structural Perspective*. *Chem*  
769 *Rev*, 2020. **120**(1): p. 5-35.

- 770 20. Finer, J.T., R.M. Simmons, and J.A. Spudich, *Single myosin molecule mechanics: piconewton*  
771 *forces and nanometre steps*. Nature, 1994. **368**(6467): p. 113-9.
- 772 21. Greenberg, M.J., H. Shuman, and E.M. Ostap, *Measuring the Kinetic and Mechanical Properties*  
773 *of Non-processive Myosins Using Optical Tweezers*. Methods Mol Biol, 2017. **1486**: p. 483-509.
- 774 22. Chen, C., et al., *Kinetic schemes for post-synchronized single molecule dynamics*. Biophys J, 2012.  
775 **102**: p. 3.
- 776 23. Woody, M.S., et al., *MEMLET: An easy-to-use tool for data fitting and model comparison using*  
777 *maximum-likelihood estimation*. Biophys J, 2016. **111**(2): p. 10.
- 778 24. Liu, Y., et al., *Omecamtiv Mecarbil Modulates the Kinetic and Motile Properties of Porcine*  
779  *$\beta$ -Cardiac Myosin*. Biochemistry, 2015. **54**: p. 13.
- 780 25. Askel, T., et al., *Ensemble force changes that result from human cardiac myosin mutations and a*  
781 *small-molecule effector*. Cell Rep, 2015. **11**: p. 11.
- 782 26. Swenson, A.M., et al., *Omecamtiv mecarbil enhances the duty ratio of human  $\beta$ -cardiac myosin*  
783 *resulting in increased calcium sensitivity and slowed force development in cardiac muscle*. J Biol  
784 Chem, 2017. **292**: p. 13.
- 785 27. Capitanio, M., R. Cicchi, and F.S. Pavone, *Position control and optical manipulation for*  
786 *nanotechnology applications*. Eur Phys J, 2005. **46**: p. 8.
- 787 28. Woody, M.S., et al., *And ultrafast EOD-based force-clamp detects rapid biomechanical*  
788 *transitions*. Int Soc Optics Photonics, 2017. **10347**.
- 789 29. Woody, M.S., et al., *Single molecule mechanics resolves the earliest events in force generation by*  
790 *cardiac myosin*. Elife, 2019. **8**.
- 791 30. Veigel, C., et al., *Load-dependent kinetics of force production by smooth muscle myosin*  
792 *measured with optical tweezers*. Nat Cell Biol, 2003. **5**(11): p. 980-6.
- 793 31. Greenberg, M.J., H. Shuman, and E.M. Ostap, *Inherent force-dependent properties of beta-*  
794 *cardiac myosin contribute to the force-velocity relationship of cardiac muscle*. Biophys J, 2014.  
795 **107**(12): p. L41-4.
- 796 32. Liu, C., et al., *Controlling load-dependent kinetics of beta-cardiac myosin at the single-molecule*  
797 *level*. Nat Struct Mol Biol, 2018. **25**(6): p. 505-514.
- 798 33. Steffen, W., et al., *Mapping the actin filament with myosin*. Proc Natl Acad Sci U S A, 2001.  
799 **98**(26): p. 14949-54.
- 800 34. Gross, P., et al., *Combining optical tweezers, single-molecule fluorescence microscopy, and*  
801 *microfluidics for studies of DNA-protein interactions*. Methods Enzymol, 2010. **475**: p. 427-53.
- 802 35. Forget, A.L., et al., *Exploring protein-DNA interactions in 3D using in situ construction,*  
803 *manipulation and visualization of individual DNA dumbbells with optical traps, microfluidics and*  
804 *fluorescence microscopy*. Nat Protoc, 2013. **8**(3): p. 525-38.
- 805 36. Luo, J., et al., *A protocol for rapid generation of recombinant adenoviruses using the AdEasy*  
806 *system*. Nat Protoc, 2007. **2**(5): p. 1236-47.
- 807 37. Chow, D., et al., *Folding of the striated muscle myosin motor domain*. J Biol Chem, 2002. **277**(39):  
808 p. 36799-807.
- 809 38. Wang, Q., C.L. Moncman, and D.A. Winkelmann, *Mutations in the motor domain modulate*  
810 *myosin activity and myofibril organization*. J Cell Sci, 2003. **116**(Pt 20): p. 4227-38.
- 811 39. Spudich, J.A. and S. Watt, *The regulation of rabbit skeletal muscle contraction. I. Biochemical*  
812 *studies of the interaction of the tropomyosin-troponin complex with actin and the proteolytic*  
813 *fragments of myosin*. J Biol Chem, 1971. **246**(15): p. 4866-71.
- 814 40. Spiess, M., et al., *Isolation, electron microscopic imaging, and 3-D visualization of native cardiac*  
815 *thin myofilaments*. J Struct Biol, 1999. **126**(2): p. 98-104.
- 816 41. Matsumoto, F., et al., *Conformational changes of troponin C within the thin filaments detected*  
817 *by neutron scattering*. J Mol Biol, 2004. **342**(4): p. 1209-21.

- 818 42. Brune, M., et al., *Direct, real-time measurement of rapid inorganic phosphate release using a*  
819 *novel fluorescent probe and its application to actomyosin subfragment 1 ATPase*. *Biochemistry*,  
820 1994. **33**(27): p. 8262-71.
- 821 43. Barua, B., et al., *Regulation of actin-myosin interaction by conserved periodic sites of*  
822 *tropomyosin*. *Proc Natl Acad Sci U S A*, 2012. **109**(45): p. 18425-30.
- 823 44. Bourdieu, L., et al., *Actin filaments on myosin beds: The velocity distribution*. *Phys Rev E Stat*  
824 *Phys Plasmas Fluids Relat Interdiscip Topics*, 1995. **52**(6): p. 6573-6579.
- 825 45. Haithcock, J., et al., *The kinetic mechanism of mouse myosin VIIA*. *J Biol Chem*, 2011. **286**(11): p.  
826 8819-28.
- 827 46. White, H.D., B. Belknap, and M.R. Webb, *Kinetics of nucleoside triphosphate cleavage and*  
828 *phosphate release steps by associated rabbit skeletal actomyosin, measured using a novel*  
829 *fluorescent probe for phosphate*. *Biochemistry*, 1997. **36**(39): p. 11828-36.
- 830 47. Phillips, J.C., et al., *Scalable molecular dynamics on CPU and GPU architectures with NAMD*. *J*  
831 *Chem Phys*, 2020. **153**.
- 832 48. Best, R.B., et al., *Optimization of the additive CHARMM all-atom protein force field targeting*  
833 *improved sampling of the backbone phi, psi and side-chain chi1 and chi2 dihedral angles*. *Journal*  
834 *of Chemical Theory and Computation*, 2012. **8**: p. 17.
- 835 49. Jorgensen, W.L., et al., *Comparison of Simple Potential Functions for Simulating Liquid Water*.  
836 *Journal of Chemical Physics J Chem Phys*, 1983. **79**(2): p. 10.
- 837 50. Menten, A., et al., *High-resolution cryo-EM structures of actin-bound myosin states reveal the*  
838 *mechanism of myosin force sensing*. *Proc Natl Acad Sci U S A*, 2018. **115**(6): p. 6.
- 839 51. Fiorin, G., M.L. Klein, and J. Hénin, *Using collective variables to drive molecular dynamics*  
840 *simulations*. *Mol Phys*, 2013. **111**: p. 18.
- 841 52. Humphrey, W., A. Dalke, and K. Schulten, *VMD - Visual Molecular Dynamics*. *J Molec Graphics*,  
842 1996. **14**: p. 6.

843
